# Supplementary material
Source: MDPI journal article supplement (https://www.mdpi.com/2076-3417/7/2/187)
Supplement: s1 [file s1]

# Supplementary Materials: Subcritical Water Extraction of Ursolic Acid from *Hedyotis diffusa*

Shangzhen Xiao, Xingjun Xi, Fei Tang, Juan Dai, Jing Liu, Jiandu Lei and Luying Wang

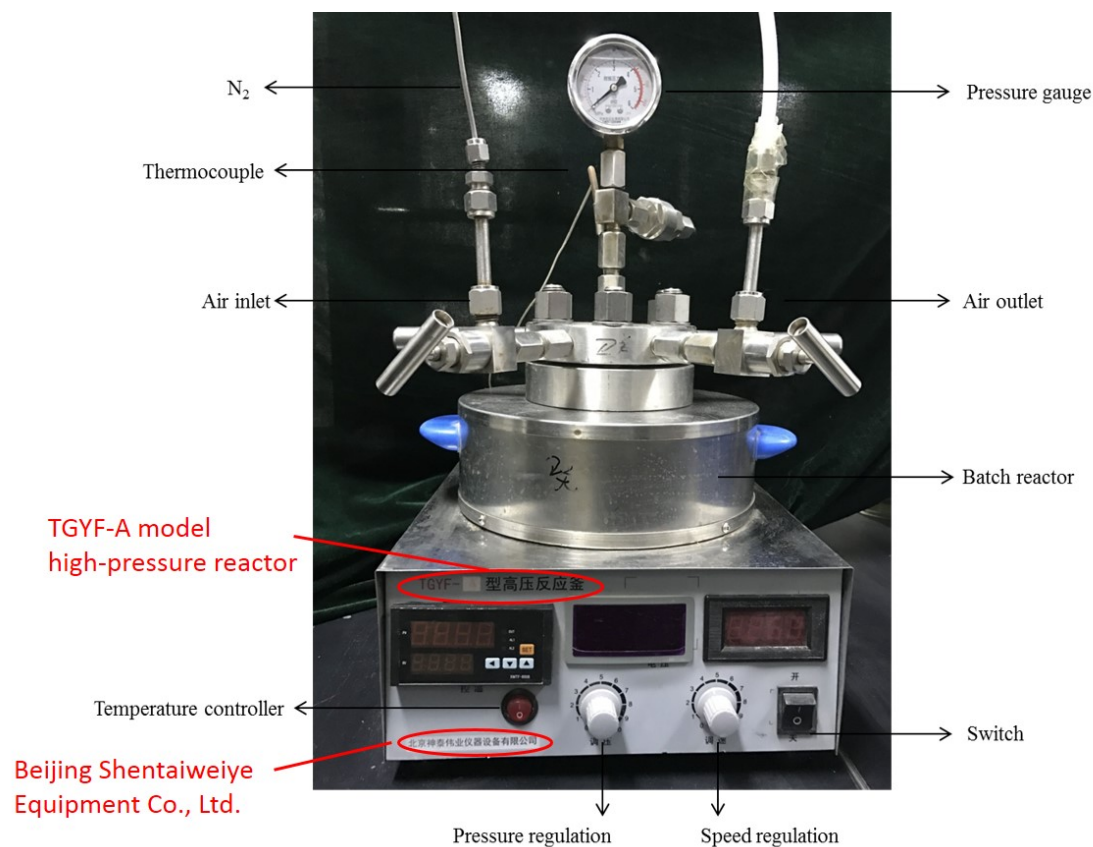

**Figure S1.** A batch reactor, constructed by Beijing Shentaiweiye Equipment Co., Ltd. (Model TGYP-A, Beijing, China), was performed for subcritical water extraction in this work.
